# Supplementary material for: Topological Spatiotemporal Mode-Locked Lasers
Source: Research Square preprint supplement (doi:10.21203/rs.3.rs-8547104/v1), 2026-02-20
Supplement: Supplementary file 1 [file 4cc3029257ada95aab525729.docx]

Supplementary Materials for

**Topological Spatiotemporal Mode-Locked Lasers**

Xiaokang Lian1,2,3, Yuchen Zhang1,2,3, Mutian Xu1,2,3, Bing Han1,2,3, Chengkun Cai1,2,3, Jun Liu1,2,3, Jian Wang1,2,3*

1Wuhan National Laboratory for Optoelectronics and School of Optical and Electronic Information, Huazhong University of Science and Technology, Wuhan 430074, Hubei, China

2Hubei Optical Fundamental Research Center, Wuhan 430074, Hubei, China

3Optics Valley Laboratory, Wuhan 430074, Hubei, China

* Corresponding Author: J.W. ([jwang@hust.edu.cn](mailto:jwang@hust.edu.cn))

# Contents

[Topological Spatiotemporal Mode-Locked Lasers 1](#_Toc218086994)

[Contents 2](#_Toc218086995)

[1 Experimental setup 3](#_Toc218086996)

[1.1 Details of experimental setup 3](#_Toc218086997)

[1.2 The demultiplexer and the multiplexer 4](#_Toc218086998)

[1.3 The crosstalk of the laser system 5](#_Toc218086999)

[2 Photonic lattices and simulation models 6](#_Toc218087000)

[2.1 Photonic lattices in topological passively mode-locked fiber lasers 6](#_Toc218087001)

[2.2 The mean-field master function 8](#_Toc218087002)

[2.3 The tight-binding model 9](#_Toc218087003)

[2.4 Lumped element model 10](#_Toc218087004)

[3 Delay induced periodic potential in the topological soliton lattice 11](#_Toc218087005)

[4 Additional measurements 14](#_Toc218087006)

[4.1 The spatiotemporal mode-locking in “Trivial” state 14](#_Toc218087007)

[4.2 The spatiotemporal mode-locking in “Topological” state 16](#_Toc218087008)

[4.3 Laser power as a function of pump power in different topological states 18](#_Toc218087009)

[5 Topological protection against cavity noise 19](#_Toc218087010)

[6 Additional supplementary graphs 23](#_Toc218087011)

# 1 Experimental setup

## 1.1 Details of experimental setup

The proposed laser cavity schematically shown in Fig. 1 comprises a main loop and a mode-division-multiplexing (MDM) sub-circuit. The main loop consists of a graded-index multimode fiber (MMF, OM3) and a home-made multimode fiber coupler (MM OC) whose 10% port serves as the primary output. The MDM section integrates a mode demultiplexer (DEMUX) and a mode multiplexer (MUX), interconnected by two single-mode fiber branches.

The OM3 MMF supports hundreds of transverse modes, but only the lowest two (OAM00 and OAM01) are selectively accessed through the single-mode branches. Both the DEMUX and MUX are directional couplers fabricated via the fused-biconical-taper technique using a standard single-mode fiber (SMF-28) and an OM3 fiber, as illustrated in Fig. 2. In the DEMUX [Fig. 2(a)], the OAM₀₁ is efficiently coupled into the fundamental mode of the SMF-28, whereas the fundamental mode OAM₀₀ and other higher-order modes remain guided within the OM3 fiber. The OM3 and SMF ports on the right side of the DEMUX are on-axis spliced to the upper and lower single-mode branches (branch-1 and branch-2), respectively. Owing to on-axis excitation, the OAM₀₀ in the OM3 fiber exhibits the highest coupling efficiency with branch-1. The optical fields from branch-1 and branch-2 are subsequently recombined into the OAM₀₀ and OAM₀₁ modes of the MMF through the MUX, as depicted in Fig. 2(b).

Each single-mode branch contains a polarization-independent isolator (ISO), 980/1550 nm wavelength-division multiplexers (WDMs), erbium-doped fibers (EDFs), 1% output single-mode couplers (SM OC-1 and SM OC-2), three-paddle polarization controllers (PC-1 and PC-2), and saturable absorbers (SA-1 and SA-2). The EDFs are optically pumped by 980 nm single-mode laser diodes (LDs). SAs are implemented by inserting a short section of OM3 fiber between two SMFs, exploiting the nonlinear multimode-interference effect. The ISOs ensure unidirectional operation of the ring cavity. A tunable optical time delay line (OTDL) is incorporated in branch-2 to balance the optical path-length difference between the two branches. The OTDL provides a tuning range of 600 ps, while larger delays can be realized by trimming or extending the SMF sections in either branch.

The length of the adopted MMF (commercial OM3 fiber) is = 2 m, with second-order dispersion parameters *β*2 = -0.0293 ps2/m for OAM00 and *β*2 = -0.0294 ps2/m for OAM01. The passive fiber and components in the two single-mode branches are based on conventional SMF-28 fiber, with a total length of = 13.3 m for each branch and a second-order dispersion parameter *β*2 = -0.0228 ps2/m. The active gain fiber EDF is SM-ESF-7-125 (from Nufern), with a length of = 1.5 m and *β*2 = 0.0485 ps2/m. The total cavity length is approximately 15.3 m. The net dispersion for branch-1 and branch-2 is estimated to be approximately -0.2549 ps2 and -0.2551 ps2, respectively, confirming the operation in the anomalous dispersion regime.

Laser outputs are characterized using an optical spectrum analyzer (YOKOGAWA AQ6370C), a radio-frequency spectrum analyzer (Agilent E4407B), an autocorrelator (Femtochrome FR-103 XL), a digital oscilloscope (Keysight DSA-Z 204A), a CCD camera, and optical power meters. The 3D pulse-field measurement and mode decomposition are performed using delay-scanned off-axis digital holography [1].

Figure 1: **Configuration of spatiotemporal mode-locked fiber laser based on MDM.** MMF: multimode fiber; SMF: single-mode fiber; MUX: multiplexer; DEMUX: demultiplexer; OTDL: optical time delay line; WDM: wave-division multiplexing; PC: polarization controller; ISO: isolator; LD: 980 nm laser diode; EDF: erbium-doped fiber; SM OC: single-mode optical coupler; NLMMI: nonlinear multimode interference; SA: saturable absorber; MM OC: multimode optical coupler.

## 1.2 The demultiplexer and the multiplexer

The DEMUX and MUX are implemented as directional modal couplers (Fig. 2), fabricated by fusing and tapering a single-mode fiber (SMF-28) with an OM3 multimode fiber under intermodal and vectorial phase-matching conditions [2–4]. The vectorial coupling relationships between the guided modes in the SMF and OM3 are illustrated in the upper panel of Fig. 2(c). Specifically, the x-polarized fundamental mode () in the SMF couples to the TE₀₁ and modes in the OM3, whereas the y-polarized couples to the TM₀₁ and modes. Throughout this work, the orbital angular momentum (OAM) basis is employed in both simulations and experiments due to its distinct azimuthal phase distribution. Variations in the birefringence of the SMF modify the phase and polarization of the fundamental mode, thereby altering the vectorial composition and phase of the coupled modes in the OM3. Different combinations of TE₀₁, , TM₀₁, and form several superpositions corresponding to linearly polarized (LP) or OAM states [5], as summarized in the lower expressions of Fig. 2(c).

The coupling efficiency of the directional modal couplers is sensitive to both the polarization and spatial profiles of the interacting modes [4]. In addition, polarization states are influenced by the birefringence of the fiber paths; variations in birefringence induce wavelength shifts through polarization-dependent spectral filtering, which arises from the phase difference between two orthogonal polarization components of the same transverse mode [6]. Consequently, the insertion loss of the DEMUX and MUX depends on the polarization state, ultimately influencing the overall cavity performance.

Figure 2: **The configuration of the demultiplexer and the multiplexer.** (**a**) shows the demultiplexer (DEMUX) and (**b**) the multiplexer (MUX). (**c**) Upper: the vectorial coupling relationship between modes in the SMF and the OM3; Lower: the mode conversion relationship in different mode basis. LP: the linearly polarization mode, OAM: the orbital angular mode.

## 1.3 The crosstalk of the laser system

Intermodal crosstalk is an inherent phenomenon in multimode fiber systems, particularly within the MMF, multimode coupler (MM OC), MUX, and DEMUX. Such crosstalk can arise from fabrication imperfections, fusion-splicing errors, fiber bending or twisting, and polarization-dependent loss. Moreover, tuning the polarization controllers (PCs) modifies the birefringence of the single-mode fibers and thereby changes the polarization state of the laser cavity. These variations affect the mode-coupling process in the MUX and DEMUX through the vectorial mode-matching mechanism [3], ultimately inducing polarization-dependent intermodal crosstalk.

Figure 3(a) highlights the section of the laser cavity (circled regions ①–④ in Fig. 1) where crosstalk is most likely to occur, encompassing the MUX, DEMUX, MMF, and MM OC. The optical path from port 1 to port 3 corresponds to single-mode branch 1, supporting the OAM00 mode, whereas the path from port 2 to port 4 corresponds to branch 2, supporting the OAM01 mode. During measurements, a continuous-wave (CW) single-mode laser at 1560 nm was injected into port 1 (or port 2) through a three-paddle polarization controller used to vary the input polarization. The output powers at port 3 and port 4 were then recorded as the PC paddles were rotated. As shown in Fig. 3(b), when light was launched along the OAM00 path (port 1 → port 3), a weak signal was also detected at port 4, indicating polarization-dependent crosstalk. The crosstalk level varied between approximately 10 dB and 17 dB with changes in the polarization state. A similar polarization-dependent behavior was observed when launching light along the OAM01 path (port 2 → port 4), where crosstalk appeared in the port 2–port 3 channel.

Figure 3: **Measurements of the crosstalk between two single-mode paths.** (**a**) The measurement configuration includes MUX, DEMUX, MMF and MM OC. (**b**) The output power as a function of polarization states (PS) modulated by the polarization controller (PC) in the input port. In (a), the real brown arrow indicates the path of OAM00 from port1to port3 while the dashed red arrow indicates the crosstalk of OAM00 to OAM01 from port1 to port4. The real blue arrow indicates the path of OAM01 from port2 to port4 while the dashed green arrow indicates the crosstalk of OAM01 to OAM00 from port2 to port3.

# 2 Photonic lattices and simulation models

## 2.1 Photonic lattices in topological passively mode-locked fiber lasers

As discussed in the main text, the mode-locked fiber lasers based on the two-branch MDM are topologically equivalent to a coupled laser oscillator model. As illustrated in Main Text Fig. 1 and Fig. 4(a), the oscillation periods of the upper and lower oscillators are denoted by *T*₁ and *T*₂, corresponding to fundamental frequencies *f*₁ and *f*₂, respectively. The lasing period and frequency of the spatiotemporal solitons are *T* and *f*, which are related by:

(1)

For a stable harmonic mode-locked laser, the two oscillators must be frequency-synchronized. Their harmonic orders differ due to the distinct lengths (or fundamental periods) of the individual oscillators. Denoting the harmonic orders of the upper and lower oscillators as *N*₁ and *N*₂, the relationship between these quantities is expressed as:

(2)

Then, it can be deduced from Eq. (1) and Eq. (2) that *N*1-*N*2=1. In other words, there is one more soliton in the long upper oscillator than that in the lower oscillator.

The soliton dynamics within the laser cavity are analyzed using a two-dimensional lattice representation, as shown in Figs. 4(b) and 4(c). Pulses in the upper and lower oscillators are denoted by ​ and ​, respectively, where *m* indexes the long-term time evolution and *n* the short-term time step (or lattice position along the oscillator). At the coupling site (highlighted in orange, representing the combined MMF, MUX, and DEMUX), the pulse comprises contributions from both transverse modes, ​ and ​​. From a given coupling site,​ travels along the upper long oscillator while ​ ​ propagates along the lower short oscillator, reaching distinct lattice positions after one long-term period due to the inter-path time delay. The interaction between the two modes at the coupling site constitutes dissipative coupling, arising from two mechanisms. First, the time delay introduces a reservoir effect, whereby a portion of the pulse energy remains in the delay line and coupling occurs between the residual portions. Second, the directional couplers and transverse-mode interactions in the MMF mediate coupling via a third mode (Section 1.2), which inevitably induces radiation leakage.

If set the upper oscillator as the main cavity and the lower oscillator is considered as a delay line reservoir, the pulse lattice in two dimensions with as the lattice position and as the long-term time step, shown in Fig. 4(b). In this case, the mathematical foundation of the pulse lattice is given as:

(3)

It is indicated from the first equations that the pulse is partial from and partial from the , implying that the distribution of modal pulses are fixed in the periodic round trips, and from the second equations that the modal pulses is moving as a unidirectional flow. The distribution of can be described as the unidirectional Hatano-Nelson lattice as shown in Main Text Fig. 1(e), which is characterized by the periodic pulses with nearest-neighbor nonreciprocal dissipative couplings.

Similarly, if set the lower oscillator as the main cavity and the upper as the reservoir, the mathematical foundation of the pulse lattice is given as follows,

(4)

It can be deduced that the distribution of can also be described as anther unidirectional Hatano-Nelson lattice, as indicated by Fig. 4(c).

Figure 4: **Pulse lattice in the topological mode-locked laser cavity with .** (**a**) Distribution of pulses in the laser cavity, left is shown in MDM configuration while right is shown in coupled oscillator configuration. (**b**) Pulse lattice in two dimensions with as the lattice position and as the time step. (**c**) Pulse lattice in two dimensions with as the lattice position and as the time step.

## 2.2 The mean-field master function

The topological mode-locked fiber laser based on MDM can be simplified as coupled oscillators with different delays. The coupled master function of mode-locking in multiple coupled oscillators can be derived from the passive fast saturable absorber model with a delay-coupled term [8,9]:

(5)

where is for the branch-p, with the period , ,, . is for the branch-r with a delay of to the branch-p. ‘’ is in integer. ‘*t*’ denotes the transverse position in the topological lattice while ‘*T*’ the longitude time. The last term in the Eq. (5) is corresponding to multiple reservoir branches, where denotes the coupling efficient, is the accumulated phase difference, ‘ ’ denotes the fundamental period, and ‘*N*’ the harmonic order.

Since the effect of delay is to induce nonreciprocal dissipative coupling, and the coupled oscillators can be understood based on the unidirectional Hatano-Nelson lattice model shown in main text. In order to investigate the dynamics of the laser based on the two-branch MDM, the governing equation can be formulated as following:

(6)

with the last term of , and . The Eq. (6) without the last term is a complex Ginzburg-Landau equation (CGLE) with dispersion (𝒟, the first term on the right hand), the nonlinear saturable absorber and materials (𝒩, the second term) and gain and loss (𝒢, the third term) [8]. The last term is the intracavity coupling term, resulted from the delay-line reservoir [10].

The evolution of gain and the saturable absorber in this model are respectively:

(7)

where is the small signal gain. is the saturated energy, which represents the pump power. is the transfer function of the saturable absorber expressed as:

(8)

where is the modulation depth and is the saturation power.

## 2.3 The tight-binding model

The delay-induced periodic lattice potential (Section 3), effectively decomposes the mean-field master equation into a set of weakly coupled nodes. Assuming *N* pulses for *N*th-order harmonic mode-locking are tightly bound at equidistant positions, the cavity can be divided in to *N* sections, each described by a pulse . The evolution of the *n*th pulse follows:

(9)

This equation has a steady-state soliton solution [9]. Projecting the pulse dynamics onto their central manifolds (peak amplitudes) and incorporating the nearest-neighbor intracavity coupling would yield a tight-binding model, described by a discrete complex Ginzburg-landau equation (dCGLE):

(10)

The last term is omitted for the unidirectional Hatano-Nelson lattice model [Main Text Fig. 1(e)] is obtained:

(11)

The evolution of gain and the saturable absorber in this model are respectively:

## 2.4 Lumped element model

The MDM-based multimode fiber laser can be simulated using a lumped propagation model, where each cavity component is represented by its transmission functions.Light propagation in the SMF, EDF and MMF is simulated using the coupled generalized multimode nonlinear Schrödinger equation (GMMNLSE) [11]:

(12)

where is the electric field envelope for the mode *p*, is the *n*th-order dispersion for mode *p*, and is the nonlinear coupling coefficient for the Kerr effect. is the gain coefficient of EDF, and for SMFs and MMFs. The term is computed in the frequency domain as:

where is the small signal gain, and the gain spectral bandwidth is denoted by the Lorentz function as follows:

where, is the bandwidth of the Lorentzian gain profile and is the central frequency.

The saturable absorber based on nonlinear multimode interference effect is modeled by a general transfer function as follows:

where is the modulation depth and is the saturation power.

The intermodal crosstalk, arising from fabrication imperfections, fusion splicing errors, fiber bending, twisting, and polarization-dependent loss, is present in the multimode fiber system, including MMF, MM OC, MUX and DEMUX, as discussed in “Materials and Methods”. This crosstalk facilitates mutual injection between the two single-transverse-mode paths, synchronizing the transverse-mode solitons. In simulations, the total crosstalk effect from all cavity components is modeled by a 2×2 matrix as follows:

where the crosstalk coupling coefficient is set to = 0.1 to accelerate the convergence.

The optical fiber time delay line is modeled by applying a corresponding phase delay in the frequency domain:

where ∆*t* is the time delay between the two single-mode fiber branches.

In simulations, light propagates sequentially through the passive SMF, active EDF, SA, MUX, MMF, MM OC, DEMUX, and back to the passive SMF. The fiber lengths and dispersion parameters match the experimental values. For the EDF, the gain bandwidth is = 5.7 THz and the small-signal gain is *g*ss = 3 (1/m). The total crosstalk coefficient *CT* in the laser cavity is set as 0.1 to accelerate the convergence. For the simulation of “Trivial” spatiotemporal mode-locking, the time delay is of = 0 ps. The saturable energy of the EDF is variable (the larger *E*sat, the larger pump power). The modulation depth and saturable power of the SA are = 0.3 and = 100 W, respectively. For the simulation of “Topological” and “Topological + BEC” spatiotemporal mode-locking, the parameters are = 0.3, = 20 W, and ∆*t* =∆*T*+GVD , where GVD is the group velocity difference and ∆*T* is the soliton period. The value of varies case by case as indicated in the main test.

# 3 Delay induced periodic potential in the topological soliton lattice

In this section, the collective coordinate method is used to deduce the delay induced periodic potential in the topological lattice formed in our laser system. In Eq. (6), the field at the delay time of ‘’ is equivalent to the delay field at the normal time of ‘*t*’ with a form of . is the accumulated phase due to the time delay. Therefore, the equation can be converted into

(13)

which is a kind of delayed GLE [9,12], supporting periodic soliton solution.

The three terms on the left hand of Eq. (13) denote the time derivative, the dispersion and the nonlinear terms, respectively, which is a main Schrödinger function for the transited soliton (usually generated in a fiber with anomalous dispersion).

(14)

The two terms on the right hand of Eq. (13) denote the gain and loss, and the coupling terms, which can be considered as the perturbation to the soliton (weak nonlinearity, weak dispersion, good balance between loss and gain) [13-15].

(15)

In order to drive the Lagrangian density , given by

(16)

the time and space derivatives of are computed as following. We adopt the moving soliton ansatz to derive the kinetic term. The wave function is assumed by the Galilean-boosted ansatz for the moving soliton [16]:

(17)

where , with being the shape of the soliton, being the global phase, being the phase gradient (which represents the soliton's instantaneous velocity), and being the soliton's center in collective coordinate method (which we aim to derive the dynamics for).

Form , we get . And the phase can be denoted as , and then . The time derivative of are as following:

The space derivative of are as following:

and the corresponding expression for ||²:

The time term in the Lagrangian density is:

We integrate over all space to compute the effective Lagrangian.

where , , , and . For soliton profiles that are symmetric about (e.g., sech profile), , and we obtain:

(18)

where is a constant energy term related to the nonlinear interaction and soliton shape, as shown in Eq. (17).

In the next step, we treat as an independent generalized coordinate and apply the variational method:

which yields the relation:

Substituting this back into Eq. 18, we get:

(19)

The standard kinetic energy term is

where is the effective mass of the soliton, determined by the soliton profile.

Based on the Euler–Lagrange equation:

Then, the equation of motion of the center of mass containing inertial terms

(20)

where the right is the derivative of an expected potential due to the perturbation [Eq. (18)], related to the generalized force . Take the perturbation into the Euler-Lagrange equation [15,16]:

(21)

The generalized force is given by

where the integration

Here,

This equation is related to the overlap of the two solitons in spatial region, therefore can be transferred into an equation about their position of .

(22)

Then:

The phase term would not affect the changes of the position, therefore, which could be omitted and keep only the real part. The resulting force is proportional to the overlap of the soliton profiles and has the form of a cosine potential:

(23)

The equation indicates that the displacement of the solitons would induce the force. Since the displacement is small, then the  can be assumed as , corresponding to the “Topological” mode-locking states, then

(24)

The harmonic field is a periodic type. Therefore, the phase difference is periodic about the spatial coordinate

where .

(25)

The periodic potential

(26)

Finally, we achieved the equation of motion for the soliton's center , as shown as Eq. (20).

# 4 Additional measurements

## 4.1 The spatiotemporal mode-locking in “Trivial” state

Figure 5 summarizes the spatiotemporal mode-locking characteristics of the laser system with a time delay of ∆*t* = 0. Panels 1 in Figs. 5(a) to 5(c) show the optical spectrum, temporal pulse train, and radio-frequency (RF) spectrum for single-mode branch 1 (OAM00) at a pump power of p1 = 51 mW, measured at the MM OC. The optical spectrum [Fig. 5(a), panel 1] exhibits a sech-shaped profile with Kelly sidebands, corresponding to characteristics of soliton mode-locking. The full width at half maximum (FWHM) is 4.4 nm from a sech fit. The inset shows the Gaussian beam profile of the output, corresponding to the OAM₀₀ transverse mode of the OM3 fiber. The pulse width, determined from the autocorrelation (AC) and sech fitting [Fig. 5(b), inset, panel 1], has an FWHM of 574 fs. The resulted time–bandwidth product (TBP) is 0.31, close to the transform-limited value of 0.315. The RF spectrum [Fig. 5(c), panel 1] displays uniformly spaced longitudinal peaks with a signal-to-noise ratio (SNR) of 47 dB, confirming high-quality soliton mode-locking. For branch 2 (OAM₀₁) at p2 = 53 mW, panels 2 in Figs. 5(a) to 5(c) show comparable results: spectral FWHM of 4.5 nm, pulse width of 557 fs, TBP of 0.31, and SNR of 48 dB, indicating high-quality soliton mode-locking too.

When both branches are pumped simultaneously, spatiotemporal mode-locking emerges with OAM₀₀ and OAM₀₁ modes. Panel 3 in Fig. 5(a) compares the MM OC output spectra with those measured from SM OC-1 and SM OC-2. The spectrum from SM OC-1 (red) shows distortion and a co-lasing CW peak at 1563 nm, distinct from branch-1 alone. SM OC-2 (olive) exhibits periodic modulation, differing from branch-2 alone. The MM OC spectrum (dark cyan) displays multiple broad peaks atop a coarse envelope, indicating a new spectrum formed through self-organization rather than a simple superposition of the individual branch spectra. The inset shows the beam profile, characterized by coherent interference of the two transverse modes.

Spatiotemporal mode-locking formation can be interpreted as synchronization of two transverse-mode solitons in the single-mode branches, evidenced by the overlap of their pulse trains and RF sequences with the multimode main path [panels 3 of Figs. 5(b) and 5(c)]. This synchronization arises from mutual injection locking, mediated by inter-branch crosstalk and resonant enhancement. Mutual injection is facilitated by resonant dispersive waves [DWs, indicated by the dashed black vertical lines shown in panel 1 to 3 in Fig. 5(a)] generated by periodic spatial inhomogeneities of the pulses. In the time domain, DWs appear as wide pedestals with exponentially decaying tails [inset of panel 3 of Fig. 5(b)]. Perturbations from one pulse to adjacent pulses induce attractive or repulsive interactions [7]. During simultaneous pumping, DWs from the two branches interact coherently, generating new DWs and enhancing multimode nonlinear interactions, which in turn mediate pulse interactions and achieve soliton synchronization.

Figure 5: **The characteristics of the spatiotemporal mode-locking in “Trivial” state.** (**a**), (**b**) and (**c**) shows respectively the spectra, the temporal train and radio-frequency (RF) spectra for three different working states of 1 to 3. The mode-locking state “1” shown in panels 1 of (a), (b) and (c) are corresponding to the transverse mode OAM00 when only pump the branch-1 with the pump power of 51 mW. The inset in panel 1 of (a) is the field distribution of the laser output, the inset in panel 1 of (b) is autocorrelation (AC) curve of the pulse, and the inset in panel 1 of (c) is the RF spectrum with a higher (100 Hz) resolution bandwidth compared to 1 MHz in (c). Similarly, the panels 2 of (a), (b) and (c) and the insets are corresponding to the transverse mode OAM01 when only pumping the branch-2 with the pump power of 53 mW. The panels 3 of (a), (b) and (c) and the insets are corresponding to the spatiotemporal mode-locking with OAM00 and OAM01 when pumping both the branch-1 and the branche-2 with the same settings of the pump power and the PC as in the single pumping in panels 1 and 2.

## 4.2 The spatiotemporal mode-locking in “Topological” state

Figure 6 presents the spatiotemporal mode-locking in “Topological” state, with a time delay of 947.63 ps. Panels 1 in Figs. 6(a) to 6(c) show the optical spectrum, temporal pulse train, and RF spectrum when only branch 1 is pumped at 150 mW. The inset of panel 1 in Fig. 6(a) displays the output field distribution corresponding to the OAM00 transverse mode. Panels 2 in Figs. 6(a) to 6(c), together with the inset, correspond to branch 2 (OAM01) under the same pump power.

Pumping a single branch alone yields a continuous-wave regime under the given polarization controller (PC) settings: both the pulse train and RF sequence fluctuate randomly, as evident in panel 2 and 3 of Figs. 6(b) and 6(c). When both branches are pumped simultaneously at 150 mW, the system transitions into a stable spatiotemporal mode-locked state, as shown in panel 3 of Figs. 6(a) to 6(c). The MM OC spectrum exhibits two distinct peaks near 1559 nm and 1564 nm, corresponding to mutual injection from branch 1 and branch 2, respectively. Notably, the spectrum under dual-branch pumping is not a simple superposition of the single-branch spectra; the peaks shift slightly relative to their original positions, as indicated by the dashed lines across panel 1 to 3 in Fig. 6(a).

Mode-locked solitons propagate across both single-mode branches at the same longitudinal frequency, as evidenced by overlapping RF spectra measured at SM OC-1, SM OC-2, and MM OC. This demonstrates strong resonant coupling between the branches: the lasing peak of one branch would induce a corresponding peak in the other branch. Such resonant interactions are absent under single-branch pumping, where crosstalk power is largely dissipated by gain-fiber losses in the unpumped branch. The enhanced mutual injection facilitated by resonant coupling is resulted from the periodic potentials induced by the topological lattices, which stabilizes the mode-locking state of the laser system, as discussed latter.

Figure 6: **The characteristics of the spatiotemporal mode-locking in “Topological” state.** (**a**), (**b**) and (**c**) shows respectively the spectra, the temporal train and radio-frequency (RF) spectra for three different working states of 1 to 3. The insets in (a) are the average field distributions of the laser output. The panels 1 in (a), (b) and (c) are corresponding to the transverse mode OAM00 when only pump the branch-1 with the pump power of 150 mW. Similarly, the panels 2 in (a), (b) and (c) and the insets are corresponding to the transverse mode OAM01 when only pumping the branch-2 with the pump power of 150 mW. The panels 3 of (a), (b) and (c) and the insets are corresponding to the spatiotemporal mode-locking with OAM00 and OAM01 when pumping both the branch-1 and the branche-2 with the same pump power and the PC settings as the cases of the single pumping in panels 1 and 2.

Figure 7 presents the spectral, beam profile, temporal, and RF characteristics of spatiotemporal mode-locking in the “Topological” state under varying pump powers. In these experiments, branch 1 was fixed at 150 mW, while branch 2 was increased from 150 to 400 mW; all other parameters, including the PC settings and the time delay (947.64 ps), were held constant. The repetition rate of 1.056 GHz remains unchanged across the pump-power range, as evidenced by panel 1 to 3 of Fig. S6B, and the corresponding pulse trains [panel 1 to 3 in Fig. 7(c)] show consistent temporal structure, confirming the pump-power independence of the repetition rate. The optical spectra [panels 1 to 3 of Fig. 7(a)] exhibit a slight blue shift as branch-2 power increases. Simultaneously, the beam profiles in the insets reveal progressively more pronounced OAM₀₁ characteristics at higher pump powers. These observations are attributed to enhanced nonlinear effects at higher pump powers, which induce shifts in the phase and consequently the spectral output.

Figure 7: **Spatiotemporal mode-locking with different pumping power.** (**a**), (**b**) and (**c**) shows respectively the spectra, the temporal train and radio-frequency (RF) spectra for three different working states of 1 to 3. The insets in (a) are the field distributions of the laser output. The panels 1 in (a), (b) and (c) are corresponding to the output results of the laser system with pump1 of 150 mW and pump2 of 150 mW. Similarly, the panels 2 in (a), (b) and (c) and the insets are corresponding to to the output results of the laser system with pump1 of 150 mW and pump2 of 300 mW. The panels 3 of (a), (b) and (c) and the insets are corresponding to to the output results of the laser system with pump1 of 150 mW and pump 2 of 400 mW.

## 4.3 Laser power as a function of pump power in different topological states

Figure 8 shows the laser output power as a function of pump power for trivial and topological spatiotemporal mode-locking states. Figs. 8(a) and 8(b) correspond to pumping a single-mode branch individually, whereas Fig. 8(c) shows results for simultaneous pumping of both branches. For the trivial state [Fig. 8(a)], the continuous-wave (CW) lasing thresholds are ~46 mW for OAM00 and ~36 mW for OAM01, with mode-locking thresholds slightly higher at 48 mW and 45 mW, respectively. The laser power coefficients, extracted from linear fits in the 50–300 mW range, are 0.00553 for OAM00 and 0.00530 for OAM01.For the topological spatiotemporal mode-locking state [Fig. 8(b)], the CW thresholds are ~46 mW for OAM₀₀ and ~38 mW for OAM01, with laser power coefficients of 0.00521 and 0.00486, respectively.

When both branches are pumped simultaneously [Fig. 8(c)], the laser power coefficients for trivial and topological spatiotemporal mode-locking are 0.01309 and 0.01137, respectively, which closely approximate the sum of the individual-branch coefficients. This scaling indicates that the output power is effectively the combination of the two single-mode branches. The distinct differences in laser power coefficients highlight the sensitivity of the mode-locked states to the polarization conditions within the cavity.

Figure 8: **Laser power as a function of pump power in different topological states.**

(**a**) shows the results of pumping only a single-mode branch in the “Trivial” state of = 0 ps for generating the spatiotemporal mode-locking (STML), (**b**) in the “Topological” state of = 947.6 ps for generating the topological STML. (**c**) shows the results of the corresponding topological states when pumping the two single single-mode branches simultaneously.

# 5 Topological protection against cavity noise

In practice, mode-locked fiber lasers are susceptible to environmental noise, such as temperature fluctuations and mechanical vibrations. Environmental perturbations often induce supermode noise or longitudinal mode drifts in mode-locked fiber lasers due to changes in fiber length. In our laser system, instability in the individual delay lines and unintentional path-length mismatches may further distort the delay-induced topological structures, leading to instability in the phase and amplitude of the spatiotemporal pulses. To evaluate the robustness of our topological laser based on MDM configuration, we perform numerical simulations with and without introducing intensity and phase disorders. The obtained results (Fig. 9 and Fig. 10) indicate clear phase instability, soliton drifts and continuous wave (CW) noise in the “Trivial” state, compared with the robustness of the laser against environmental noise in both the “Topological” and “Topological + BEC” states.

Figure 9 and Fig. 10 display the optical spectra, pulse patterns, and phase profiles for the “Topological”, “Topological + BEC”, and “Trivial” states, respectively, without/with disorders, respectively. For the “Topological” and “Topological + BEC” states, as shown in panels 1 of Figs. 10(a) and 10(b), the pulse patterns exhibit no significant deviation from those in the disorder-free case as shown in Fig. 9. Similarly, the pulse phase, corresponding to a trapping potential around the pulses shown in panels 2 of Figs. 10(a) and 10(b), remains largely unchanged in the central region, with only minor distortions appearing far from the center. The optical spectra shown in panels 3 of Figs. 10(a) and 10(b) also remain consistent, albeit with a slightly elevated noise floor up to approximately –80 dB. These results confirm the robustness of the laser against environmental noise in both the “Topological” and “Topological + BEC” states. In contrast, the laser exhibits clear instability in the “Trivial” state, as evidenced by comparing the disordered results shown in Fig. 10(c) with their disorder-free counterpart in Fig. 9(c). Firstly, the soliton drifts at varying velocities, evidenced by different final positions after 500 round trips, as shown in panel 1 of Fig. S20C. Secondly, the phase profile shown in panel 2 of Fig. 10(c) is severely distorted and partially truncated. Such distortion of the phase potential under noise can undermine the soliton’s ability to resist fusion or annihilation due to stochastic interactions and may degrade coherence [18,19]. Thirdly, the noise floor rises to about –50 dB, and a distinct CW peak emerges alongside the pulse spectrum shown in panel 3 of Fig. 10(c), indicating mode-locking instability.

Figure 9: **Pulse patterns and phases in different topological states.** **(a)-(c)** show respectively the results for the topological states of “Topological”, “Topological + BEC” and the “Trivial”, simulated without intensity and phase disorders. The panels 1 are the pulse patterns, the panels 2 are the zoomed pulse profile of panels 1 as indicated and their phase curves, and the panels 3 are the corresponding spectra. It should be noted that only the firstly two modes are shown and the other high-order modes are omitted due to low intensity.

Figure 10: **Simulation results for mode-locking robustness against cavity noise.** **(a)-(c)** show respectively the results for the topological states of “Topological”, “Topological + BEC” and the “Trivial”, simulated with intensity and phase disorders of *N* (0, 1x10-3) + *iN* (0, 1x10-3) W-2. The panels 1 are pulse patterns, panels 2 are zoomed-in pulse profiles of panels 1 (blue rectangle) overlaid with their phase curves, and panels 3 are corresponding optical spectra. Note that visualizations are limited to the first two modes, and the other high-order modes are excluded due to their low intensity.

The measured RF spectra [Figs. 11(b) and 11(c)] indicate that the mode-locking state remains well confined to the main harmonic frequency peaks given by (where *n* is an integer), with virtually no supermode or spurious noise peaks between them across all three topological states of “Topological”, “Topological + BEC”, and “Trivial”. However, similar to the coexisting CW peaks observed in the simulated optical spectra with intensity and phase noises, measurable CW peaks consistently appear in the optical spectra of the “Trivial” state [panel 1 in Fig. 11(c) and panel 3 in Fig. 10(c)]. In contrast, the “Topological” and “Topological + BEC” states exhibit clean optical spectra without noticeable CW peaks [panel 1 in Figs. 11(a) and 11(b)]. The signal-to-noise ratio (SNR) for the “Trivial” state is considerably lower (~26 dB) compared to that for the “Topological” (~58 dB) and “Topological + BEC” (~55 dB) states. This low SNR indicates that the “Trivial” mode-locking state is more susceptible to environmental perturbations and exbibits relatively poorer stability. In the experiments, it is difficult to sustain mode-locking for a long time in the “trivial” state, unlike the long-term stable mode-locking operation achieved in the “Topological” and “Topological + BEC” states. To enhance mode-locking stability, longitudinal mode drifts and mode beats should be controlled—for instance, by actively stabilizing the cavity length against the perturbations.

Figure 11: **Experimental results for mode-locking robustness against cavity noise.** (**a**)-(**c**) Characterization of the (a) “Topological”, (b) “Topological + BEC”, and (c) “Trivial” states. The upper panels 1 display optical spectra, and the lower panels 2 show the corresponding high-resolution RF spectra.

# 6 Additional supplementary graphs

Figure 12: **The soliton condensation as the time delay reduces.** (**a**)-(**c**) show respectively the characteristics of the spectra, pulse train, and the phase for the time delays of 300 ps, 75 ps, 9 ps, 0 ps, corresponding to panels 1 to 4. The simulations were carried out based on the master function with various , Esat = 300 pJ and the other parameters are constants. The results were simulated by Eq. (6).

Figure 13: **The soliton condensation as the pump power increases.** (**a**)-(**c**) show respectively the characteristics of the spectra, pulse train, and the phase for the Esat of 300 pJ, 350 pJ, 400 pJ, 450 pJ, corresponding to panels 1 to 4. The simulations were carried out based on the master function with various Esat, = 150 ps and the other parameters are constants. Esat is positive correlated with the pump power in the experiments. The results were simulated by Eq. (6).

Figure 14: **Simulated results with the tight-binding model.** (**a**)-(**d**) show the pulse train in stable state for the pulse period of 300 ps, 75 ps, 9 ps, 1.17 ps, respectively. The results were simulated by Eq. (11).

Figure 15: **Measured results of the laser in different spatiotemporal mode-locking states.** (**a**)-(**d**) show the spectrum, the pulse train, the zoomed part of pulse train, and the modal decomposition, respectively. The time-integrated beam profiles are shown in the inset of (**a**). Panels 1-4 show the results for four samples with the time delay of 1713 ps, 350 ps, 64 ps and 0 ps, respectively, corresponding to the results shown in Main Text Fig. 4a.

Figure 16: **Spectral resolved modal decomposition and power ratio.** (**a**) A portion of spectrum from the panel 2 in Fig. 2A for = 60 ps. (**b**), (**c**) and (**d**) show the spectral resolved beam intensity, phase profiles and the modal decompositions for three spectral positions indicated in (**a**). Mode decompositions at three spectral positions within one modulation period around 1564 nm are shown in (b) to (d). The spectrally resolved beam is dominated by OAM₀₀ and OAM₀₁, resulting in an intensity distribution resembling an eccentric disk with an off-center singularity, consistent with the phase profile. Both the intensity distribution and the modal power ratio vary with wavelength. The OAM₀₀ (mode 1) component is stronger at the spectral positions in (b) and (d), whereas OAM₀₁ (mode 2) dominates at the position in (c). Despite these variations, the time-averaged power of OAM₀₀ and OAM₀₁ remains approximately equal, as shown in Fig. 8, under equal pumping power of the two single-mode branches.

Figure 17: **Evolution of the RF Spectra of fundamental frequency as a function of time delay .** The RF spectra measured with a high resolution (bandwidth = 1 kHz) keep almost a similar shape (bandwidth) from = 350 ps to 64 ps. However, the bandwidth of the frequency peak for = 0 ps is obviously reduced, corresponding to the transformation of the topological states.

Figure 18: **Simulated results with the lumped model for the spatiotemporal mode-locking in the laser based on the 6-branch MDM.** (**a**) show the results for = 400 ps, simulated without intensity and phase disorders. The panels 1 and 4 are for the evolution of the spectra and the spectrum at last round trip, respectively. The panels 2 and 5 are for the evolution of pulse patterns and the pulse train at last round trip, respectively. The panel 3 is for the average modal power as the function of the round-trip. The panel 6 is the zoomed part of pulse from the panel 5, and the inset is the beam profile. Similarly, (**b**) show the results for = 400 ps, simulated with intensity and phase disorders of *N*(0,1e-3) + *iN*(0,1e-3) W-2.

**References**

1. Pourbeyram, H. et al. Direct observations of thermalization to a Rayleigh–Jeans distribution in multimode optical fibres*. Nat. Phys.* **18**, 685–690 (2022).
2. Ismaeel, R., Lee, T., Oduro, B., Jung, Y., and Brambilla, G. All-fiber fused directional coupler for highly efficient spatial mode conversion. *Opt. Exp*. **22**, 11610-11619 (2014).
3. Park, K. J., Song, K. Y., Kim, Y. K., Lee, J. H. and Kim, B. Y. Broadband mode division multiplexer using all-fiber mode selective couplers. *Opt. Exp*. **24**, 3543-3549 (2016).
4. Liang Fang and Jian Wang. Full-Vectorial Mode Coupling in Optical Fibers. *IEEE J. Quan. Electron*. **54**, 6800207 (2018).
5. Chen, S. and Wang, J. Theoretical analyses on orbital angular momentum modes in conventional graded-index multimode fibre. *Sci. Rep*. **7**, 3990 (2017).
6. Man, W. S., Tam, H. Y., Demokan, M. S., Wai, P. K. A., and Tang, D. Y. Mechanism of intrinsic wavelength tuning and sideband asymmetry in a passively mode-locked soliton fiber ring laser. *J. Opt. Soc. Am. B* **17**, 28-33 (2000).
7. Liu, X. and Pang, M. Revealing the buildup dynamics of harmonic mode-locking states in ultrafast lasers. *Laser & Photonics Reviews* **13**, 1800333 (2019).
8. Haus, H. A. Mode-locking of lasers. *IEEE J. Select. Topics Quantum Electron*. **6**, 1173–1185 (2000).
9. Yanchuk, S. & Giacomelli, G. Spatio-temporal phenomena in complex systems with time delays. *J. Phys. A: Math. Theor*. **50**, 103001 (2017).
10. Leefmans, C. R. et al. Topological temporally mode-locked laser. *Nat. Phys*. **20**, 852–858 (2024).
11. Wright, L. G., Christodoulides, D. N. & Wise, F. W. Spatiotemporal mode-locking in multimode fiber lasers. Science **358**, 94–97 (2017).
12. Garbin, B., Javaloyes, J., Tissoni, G. & Barland, S. Topological solitons as addressable phase bits in a driven laser. *Nat. Commun.* **6**, 5915 (2015).
13. D. Anderson, Variational approach to nonlinear pulse propagation in optical fibers. *Phys. Rev. A* **27**, 3135–3145 (1983).
14. Matsko, A. B. & Maleki, L. On timing jitter of mode locked Kerr frequency combs. *Opt. Exp*. **21**, 28862-28876 (2013).
15. Englebert, N. Bloch oscillations of coherently driven dissipative solitons in a synthetic dimension.*Nat. Phys.* **19**, 1014–1021 (2023).
16. Malomed, B. A. Soliton models: Traditional and novel, one- and multidimensional. *Low Temp. Phys.* **48**, 856–895 (2022).
17. Abdullaev, F. Kh., Baizakov, B. B., Darmanyan, S. A., Konotop, V. V. & Salerno, M. Nonlinear excitations in arrays of Bose-Einstein condensates. *Phys. Rev. A* **64**, 043606 (2001).
18. Pottiez, O. et al. Supermode noise of harmonically mode-locked erbium fiber lasers with composite cavity. *IEEE J. Quantum Electron*. **38**, 252–259 (2002).
19. Harvey, G. T. & Mollenauer, L. F. Harmonically mode-locked fiber ring laser with an internal Fabry–Perot stabilizer for soliton transmission. *Opt. Lett*. **18**, 107 (1993).
